# Supplementary material for: Generation of Insulin-Producing Cells from Human Bone Marrow-Derived Mesenchymal Stem Cells: Comparison of Three Differentiation Protocols
Source: Hindawi journal article supplement (doi:10.1155/2014/832736), 2014-01-01
Supplement: f1 [file 832736.f1.pdf]

**Table 1: Values for relative gene expression values for the studied genes of HBM-MSCs by the three studied protocols (donor# 1)**

|                | Undifferentiated MSCs |            | One-Step |         | Two-Step |          | Three-Step |          | Human Islets |
|----------------|-----------------------|------------|----------|---------|----------|----------|------------|----------|--------------|
|                |                       |            |          |         |          |          |            |          |              |
| <b>INS</b>     | Undetected            | Undetected | 0.00352  | 0.00354 | 0.008609 | 0.006801 | 0.001724   | 0.001642 | 1            |
| <b>GCG</b>     | 0.00072               | 0.00066    | 0.00427  | 0.00630 | 0.010525 | 0.009099 | 0.003988   | 0.003217 | 1            |
| <b>PDX1</b>    | 0.00061               | 0.00065    | 0.00290  | 0.00175 | 0.002743 | 0.002355 | 0.003262   | 0.002705 | 1            |
| <b>SST</b>     | 0.00024               | 0.00021    | 0.00251  | 0.00229 | 0.002388 | 0.002323 | 0.005263   | 0.003906 | 1            |
| <b>NGN3</b>    | 0.00045               | 0.00000    | 0.00729  | 0.00787 | 0.00194  | 0.001289 | 0.005563   | 0.010453 | 1            |
| <b>PAX4</b>    | 0.00016               | 0.00015    | 0.00148  | 0.00430 | 0.00072  | 0.000569 | 0.001874   | 0.001381 | 1            |
| <b>GCK</b>     | 0.00370               | 0.00357    | 0.00694  | 0.01584 | 0.005119 | 0.004979 | 0.001228   | 0.001099 | 1            |
| <b>RFX6</b>    | 0.00246               | 0.00278    | 0.01305  | 0.01871 | 0.007599 | 0.010097 | 0.006434   | 0.007599 | 1            |
| <b>GLUT2</b>   | 0.00058               | 0.00047    | 0.00306  | 0.00962 | 0.003721 | 0.003799 | 0.002388   | 0.002137 | 1            |
| <b>Neurod1</b> | 0.00035               | 0.00039    | 0.03280  | 0.04904 | 0.11908  | 0.119908 | 0.035403   | 0.021344 | 1            |
| <b>NES</b>     | 0.00319               | 0.00261    | 0.02149  | 0.02936 | 0.018453 | 0.017948 | 0.00734    | 0.006661 | 1            |
| <b>MafA</b>    | 0.00239               | 0.00249    | 0.00989  | 0.01128 | 0.003377 | 0.004876 | 0.007759   | 0.003496 | 1            |
| <b>MafB</b>    | 0.00704               | 0.00609    | 0.01031  | 0.01418 | 0.007041 | 0.007041 | 0.200267   | 0.205898 | 1            |
| <b>OCT4</b>    | 0.00043               | 0.00042    | 0.00526  | 0.00996 | 0.000899 | 0.000918 | 0.002507   | 0.002472 | 1            |

**Table 2: Values for relative gene expression values for the studied genes of HBM-MSCs by the three studied protocols (donor # 2)**

|              | Undifferentiated MSCs |            | One-Step |          | Two-Step |         | Three-Step |          | Human Islets |
|--------------|-----------------------|------------|----------|----------|----------|---------|------------|----------|--------------|
|              |                       |            |          |          |          |         |            |          |              |
| <b>INS</b>   | Undetected            | Undetected | 0.005119 | 0.006848 | 0.00271  | 0.00328 | 0.006708   | 0.005839 | 1            |
| <b>GCG</b>   | 0.000662              | 0.00075    | 0.001575 | 0.001677 | 0.00267  | 0.00267 | 0.008609   | 0.004334 | 1            |
| <b>PDX1</b>  | 0.000745              | 0.000905   | 0.001186 | 0.000937 | 0.00229  | 0.00160 | 0.004158   | 0.003773 | 1            |
| <b>SST</b>   | 0.002291              | 0.003354   | 0.002455 | 0.004187 | 0.00132  | 0.00436 | 0.007546   | 0.006661 | 1            |
| <b>NGN3</b>  | 0.004809              | 0.005486   | 0.002275 | 0.003065 | 0.00189  | 0.00254 | 0.013602   | 0.011359 | 1            |
| <b>PAX4</b>  | 0.000549              | 0.000772   | 0.000386 | 0.000386 | 0.00040  | 0.00072 | 0.002542   | 0.002631 | 1            |
| <b>GCK</b>   | 0.000103              | 9.12E-05   | 0.000269 | 0.00016  | 0.00065  | 0.00064 | 0.001511   | 0.00141  | 1            |
| <b>RFX6</b>  | 0.005524              | 0.006215   | 0.001069 | 0.002152 | 0.00218  | 0.00286 | 0.004072   | 0.004187 | 1            |
| <b>GLUT2</b> | 0.000394              | 0.000557   | 0.001298 | 0.0014   | 0.00302  | 0.00413 | 0.003961   | 0.003472 | 1            |

|                |          |          |          |          |         |         |          |          |   |
|----------------|----------|----------|----------|----------|---------|---------|----------|----------|---|
| <b>Neurod1</b> | 0.007759 | 0.00613  | 0.008032 | 0.008912 | 0.01278 | 0.04972 | 0.021197 | 0.020193 | 1 |
| <b>NES</b>     | 0.004876 | 0.002182 | 0.006302 | 0.005263 | 0.01468 | 0.02336 | 0.009486 | 0.008609 | 1 |
| <b>MafA</b>    | 0.000459 | 0.000681 | 0.00113  | 0.001586 | 0.00313 | 0.00385 | 0.005226 | 0.010097 | 1 |
| <b>MafB</b>    | 0.001631 | 0.001501 | 0.007867 | 0.007442 | 0.00249 | 0.00340 | 0.009037 | 0.007867 | 1 |
| <b>OCT4</b>    | 0.000316 | 0.000229 | 0.000343 | 0.00044  | 0.00071 | 0.00112 | 0.002388 | 0.001913 | 1 |

**Table 3: Values for relative gene expression values for the studied genes of HBM-MSCs by the three studied protocols (donor # 3)**

|                | Undifferentiated MSCs |            | One-Step |          | Two-Step |         | Three-Step |          | Human Islets |
|----------------|-----------------------|------------|----------|----------|----------|---------|------------|----------|--------------|
|                |                       |            |          |          |          |         |            |          |              |
| <b>INS</b>     | Undetected            | Undetected | 0.00530  | 0.00498  | 0.00568  | 0.00523 | 0.002093   | 0.002899 | 1            |
| <b>GCG</b>     | 0.00003               | 0.00003    | 0.00662  | 0.01252  | 0.00734  | 0.00916 | 0.004581   | 0.005048 | 1            |
| <b>PDX1</b>    | 0.00001               | 0.00001    | 0.00523  | 0.00626  | 0.00744  | 0.01192 | 0.002613   | 0.003044 | 1            |
| <b>SST</b>     | 0.01184               | 0.01305    | 0.00820  | 0.00916  | 0.00803  | 0.00891 | 0.006661   | 0.006992 | 1            |
| <b>NGN3</b>    | 0.01782               | 0.01951    | 0.00600  | 0.00798  | 0.01698  | 0.01618 | 0.007239   | 0.008851 | 1            |
| <b>PAX4</b>    | 0.00803               | 0.00949    | 0.00170  | 0.00180  | 0.00227  | 0.00439 | 0.00198    | 0.002613 | 1            |
| <b>GCK</b>     | 0.00015               | 0.00022    | 0.00622  | 0.00699  | 0.00155  | 0.00407 | 0.001298   | 0.0017   | 1            |
| <b>RFX6</b>    | 0.04389               | 0.05329    | 0.026461 | 0.084788 | 0.01024  | 0.03955 | 0.003906   | 0.004776 | 1            |
| <b>GLUT2</b>   | 0.00362               | 0.00362    | 0.00290  | 0.00302  | 0.00465  | 0.00494 | 0.004809   | 0.003879 | 1            |
| <b>Neurod1</b> | 0.05403               | 0.06381    | 0.04870  | 0.02664  | 0.03443  | 0.02486 | 0.071298   | 0.019104 | 1            |
| <b>NES</b>     | 0.00220               | 0.00204    | 0.00512  | 0.00719  | 0.00744  | 0.00549 | 0.275476   | 0.325335 | 1            |
| <b>MafA</b>    | 0.00126               | 0.00129    | 0.01017  | 0.00837  | 0.00910  | 0.00765 | 0.005263   | 0.006346 | 1            |
| <b>MafB</b>    | 0.00635               | 0.00729    | 0.00110  | 0.00091  | 0.00244  | 0.00212 | 0.156041   | 0.154963 | 1            |
| <b>OCT4</b>    | 0.00046               | 0.00043    | 0.00160  | 0.00319  | 0.00357  | 0.00328 | 0.002137   | 0.002323 | 1            |

**Table (4): Values for In vitro human insulin release (ng/ $\mu$ g protein/hour) among cells from all donors in the three protocols**

| Glucose conc.                    |                                     |                                     |                                     |                  |
|----------------------------------|-------------------------------------|-------------------------------------|-------------------------------------|------------------|
| Protocol                         | 5.5 mM                              | 12 mM                               | 25 mM                               | P-Value          |
| <b>One Step:</b>                 |                                     |                                     |                                     |                  |
| <b>Donor 1</b>                   | 0.005                               | 0.009                               | 0.018                               |                  |
|                                  | 0.003                               | 0.007                               | 0.015                               |                  |
|                                  | 0.003                               | 0.008                               | 0.017                               |                  |
|                                  | 0.004                               | 0.009                               | 0.019                               |                  |
|                                  | -----                               | -----                               | -----                               |                  |
| <b>Donor 2</b>                   | 0.004                               | 0.01                                | 0.016                               |                  |
|                                  | 0.007                               | 0.012                               | 0.018                               |                  |
|                                  | 0.006                               | 0.011                               | 0.019                               |                  |
|                                  | 0.007                               | 0.013                               | 0.02                                |                  |
|                                  | -----                               | -----                               | -----                               |                  |
| <b>Donor 3</b>                   | 0.004                               | 0.009                               | 0.015                               |                  |
|                                  | 0.003                               | 0.008                               | 0.012                               |                  |
|                                  | 0.006                               | 0.01                                | 0.02                                |                  |
|                                  | 0.004                               | 0.008                               | 0.017                               |                  |
| <b>Mean <math>\pm</math> S.D</b> | <b>0.005 <math>\pm</math> 0.001</b> | <b>0.009 <math>\pm</math> 0.002</b> | <b>0.017 <math>\pm</math> 0.002</b> | <b>&lt; 0.05</b> |

| <b>Two Step:</b>  |                      |                      |                      |                  |
|-------------------|----------------------|----------------------|----------------------|------------------|
| <b>Donor 1</b>    | 0.007                | 0.01                 | 0.02                 |                  |
|                   | 0.005                | 0.008                | 0.019                |                  |
|                   | 0.008                | 0.012                | 0.024                |                  |
|                   | 0.005                | 0.009                | 0.02                 |                  |
| -----             |                      |                      |                      |                  |
| <b>Donor 2</b>    | 0.007                | 0.013                | 0.024                |                  |
|                   | 0.008                | 0.015                | 0.026                |                  |
|                   | 0.005                | 0.012                | 0.019                |                  |
|                   | 0.007                | 0.014                | 0.021                |                  |
| -----             |                      |                      |                      |                  |
| <b>Donor 3</b>    | 0.003                | 0.009                | 0.01                 |                  |
|                   | 0.005                | 0.01                 | 0.016                |                  |
|                   | 0.007                | 0.012                | 0.02                 |                  |
|                   | 0.004                | 0.01                 | 0.02                 |                  |
| <b>Mean ± S.D</b> | <b>0.006 ± 0.002</b> | <b>0.011 ± 0.002</b> | <b>0.019 ± 0.004</b> | <b>&lt; 0.05</b> |

| <b>Three Step:</b> |                      |                      |                      |                  |
|--------------------|----------------------|----------------------|----------------------|------------------|
| <b>Donor 1</b>     | 0.003                | 0.005                | 0.014                |                  |
|                    | 0.005                | 0.008                | 0.017                |                  |
|                    | 0.002                | 0.004                | 0.012                |                  |
|                    | 0.003                | 0.006                | 0.013                |                  |
| <b>Donor 2</b>     | -----                | -----                | -----                |                  |
|                    | 0.006                | 0.013                | 0.019                |                  |
|                    | 0.009                | 0.015                | 0.022                |                  |
|                    | 0.005                | 0.011                | 0.018                |                  |
| <b>Donor 3</b>     | 0.007                | 0.013                | 0.02                 |                  |
|                    | -----                | -----                | -----                |                  |
|                    | 0.008                | 0.014                | 0.023                |                  |
|                    | 0.006                | 0.012                | 0.019                |                  |
| <b>Mean ± S.D</b>  | 0.009                | 0.016                | 0.025                |                  |
|                    | 0.008                | 0.015                | 0.023                |                  |
|                    | <b>0.006 ± 0.002</b> | <b>0.011 ± 0.004</b> | <b>0.019 ± 0.004</b> | <b>&lt; 0.05</b> |
|                    |                      |                      |                      |                  |
| <b>P-Value</b>     | <b>0.23</b>          | <b>0.02</b>          | <b>0.05</b>          |                  |

**Table (5): Values for In vitro human c-peptide release (ng/μg protein/hour) among cells from all donors in the three protocols**

| Glucose conc. | 5.5 mM | 12 mM | 25 mM | P-Value |
|---------------|--------|-------|-------|---------|
| Protocol      |        |       |       |         |

|                   |                      |                      |                      |                  |
|-------------------|----------------------|----------------------|----------------------|------------------|
| <b>One Step:</b>  |                      |                      |                      |                  |
| <b>Donor 1</b>    | 0.007                | 0.015                | 0.02                 |                  |
|                   | 0.006                | 0.012                | 0.018                |                  |
|                   | 0.005                | 0.013                | 0.017                |                  |
|                   | 0.006                | 0.016                | 0.022                |                  |
| <b>Donor 2</b>    | -----                | -----                | -----                |                  |
|                   | 0.006                | 0.011                | 0.018                |                  |
|                   | 0.009                | 0.02                 | 0.027                |                  |
|                   | 0.008                | 0.018                | 0.023                |                  |
| <b>Donor 3</b>    | 0.009                | 0.02                 | 0.028                |                  |
|                   | -----                | -----                | -----                |                  |
|                   | 0.006                | 0.012                | 0.02                 |                  |
|                   | 0.005                | 0.01                 | 0.018                |                  |
| <b>Mean ± S.D</b> | 0.008                | 0.017                | 0.025                |                  |
|                   | 0.005                | 0.011                | 0.02                 |                  |
|                   | <b>0.007 ± 0.001</b> | <b>0.015 ± 0.004</b> | <b>0.021 ± 0.004</b> | <b>&lt; 0.05</b> |

| <b>Two Step:</b>  |                      |                      |                      |                  |
|-------------------|----------------------|----------------------|----------------------|------------------|
| <b>Donor 1</b>    | 0.009                | 0.018                | 0.023                |                  |
|                   | 0.007                | 0.015                | 0.02                 |                  |
|                   | 0.01                 | 0.02                 | 0.028                |                  |
|                   | 0.006                | 0.013                | 0.019                |                  |
| <b>Donor 2</b>    | 0.009                | 0.018                | 0.023                |                  |
|                   | 0.01                 | 0.02                 | 0.027                |                  |
|                   | 0.007                | 0.015                | 0.021                |                  |
|                   | 0.008                | 0.019                | 0.024                |                  |
| <b>Donor 3</b>    | 0.005                | 0.01                 | 0.018                |                  |
|                   | 0.007                | 0.017                | 0.022                |                  |
|                   | 0.008                | 0.019                | 0.023                |                  |
|                   | 0.006                | 0.01                 | 0.019                |                  |
| <b>Mean ± S.D</b> | <b>0.008 ± 0.002</b> | <b>0.019 ± 0.004</b> | <b>0.022 ± 0.003</b> | <b>&lt; 0.05</b> |

| <b>Three Step:</b> |                      |                      |                      |                  |
|--------------------|----------------------|----------------------|----------------------|------------------|
| <b>Donor 1</b>     | 0.005                | 0.012                | 0.018                |                  |
|                    | 0.007                | 0.014                | 0.02                 |                  |
|                    | 0.004                | 0.011                | 0.016                |                  |
|                    | 0.005                | 0.013                | 0.018                |                  |
| <b>Donor 2</b>     | -----                | -----                | -----                |                  |
|                    | 0.009                | 0.02                 | 0.026                |                  |
|                    | 0.01                 | 0.022                | 0.03                 |                  |
|                    | 0.007                | 0.016                | 0.021                |                  |
| <b>Donor 3</b>     | 0.009                | 0.02                 | 0.029                |                  |
|                    | -----                | -----                | -----                |                  |
|                    | 0.01                 | 0.023                | 0.03                 |                  |
|                    | 0.008                | 0.017                | 0.024                |                  |
| <b>Mean ± S.D</b>  | 0.012                | 0.024                | 0.032                |                  |
|                    | 0.011                | 0.023                | 0.03                 |                  |
| <b>Mean ± S.D</b>  | <b>0.008 ± 0.003</b> | <b>0.018 ± 0.005</b> | <b>0.024 ± 0.006</b> | <b>&lt; 0.05</b> |
| <b>P-Value</b>     | <b>0.39</b>          | <b>0.32</b>          | <b>0.33</b>          |                  |
